# Supplementary material for: Structural analysis and molecular substrate recognition properties of Arabidopsis thaliana ornithine transcarbamylase, the molecular target of phaseolotoxin produced by Pseudomonas syringae
Source: Frontiers journal article supplement (doi:10.3389/fpls.2023.1297956), 2023-12-18
Supplement: Image_1.pdf [file Image_1.pdf]

## SUPPLEMENTARY INFORMATION

### **Structural analysis and molecular substrate recognition properties of *Arabidopsis thaliana* ornithine transcarbamylase, the molecular target of phaseolotoxin produced by *Pseudomonas syringae***

**Maciej Nielipinski<sup>1</sup>, Agnieszka J. Pietrzyk-Brzezinska<sup>1</sup>, Alexander Wlodawer<sup>2</sup>, Bartosz  
Sekula<sup>1\*</sup>**

<sup>1</sup>Institute of Molecular and Industrial Biotechnology, Faculty of Biotechnology and Food Sciences,  
Lodz University of Technology, Lodz, Poland

<sup>2</sup>Center for Structural Biology, National Cancer Institute, Frederick, MD, United States

#### **\*Correspondence:**

Bartosz Sekula

Institute of Molecular and Industrial Biotechnology

Lodz University of Technology

Stefanowskiego 2/22

90-537 Lodz, Poland

+48 42-631-34-41

[bartosz.sekula@p.lodz.pl](mailto:bartosz.sekula@p.lodz.pl)

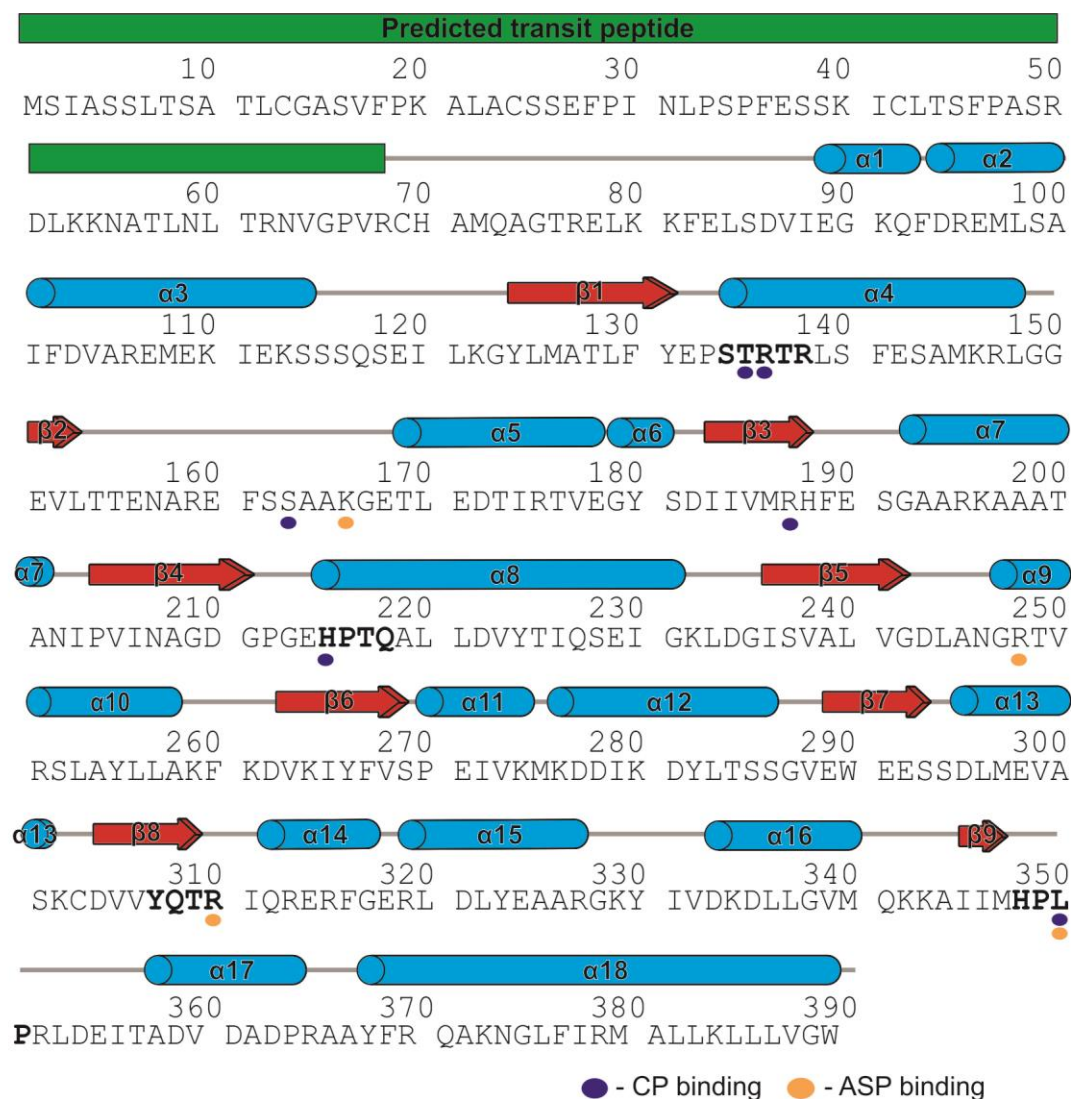

**Supplementary Figure S1. *Arabidopsis thaliana* aspartate transcarbamylase (AtATC).** Secondary structure and binding sites of AtATC mapped on the primary structure of AtATC (UniProt ID: P49077). Conserved motifs are bold. Secondary structure elements are shown as blue pipes (helices); red arrows ( $\beta$ -strands), and grey lines (loop regions); the green solid cuboid depicts the predicted transit peptide. Residues interacting with CP and ASP in the active site are marked with purple and orange dots.
